# Supplementary material for: Effect of Trace Metal Ions on the Conformational Stability of the Visual Photoreceptor Rhodopsin
Source: Preprints.org preprint supplement (doi:10.20944/preprints202306.0828.v1), 2023-06-12
Supplement: Supplementary file 1 [file supplementary]

## Supplementary material

### Effect of trace metal ions on the conformational stability of the visual photoreceptor rhodopsin

Feifei Wang, Pol Fernandez-Gonzalez, Eva Ramon, Margarita Morillo and Pere Garriga\*

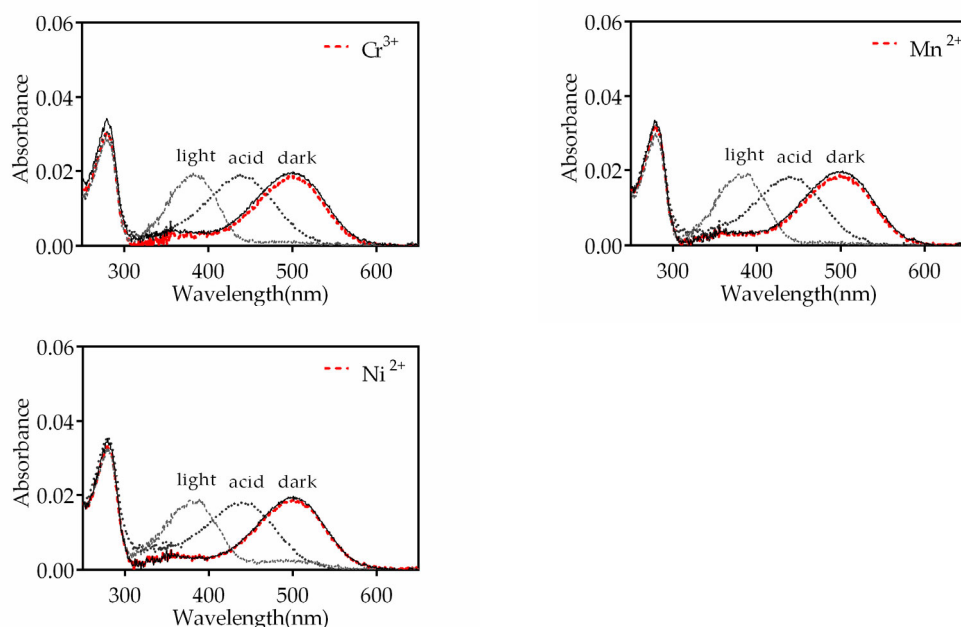

**Figure S1.** UV-vis absorption spectra of Rho were obtained following pre-treatment with  $\text{Cr}^{3+}$ ,  $\text{Mn}^{2+}$ , and  $\text{Ni}^{2+}$ , at a final concentration is 50  $\mu\text{M}$ . Spectra of samples were recorded in the dark state (dark, solid line), after metal addition (dark, dashed red line), upon photobleaching for 30 s (light, dashed line) and after acidification with 2N  $\text{H}_2\text{SO}_4$  (acid, dotted line). All the above experiments were conducted at 20°C.

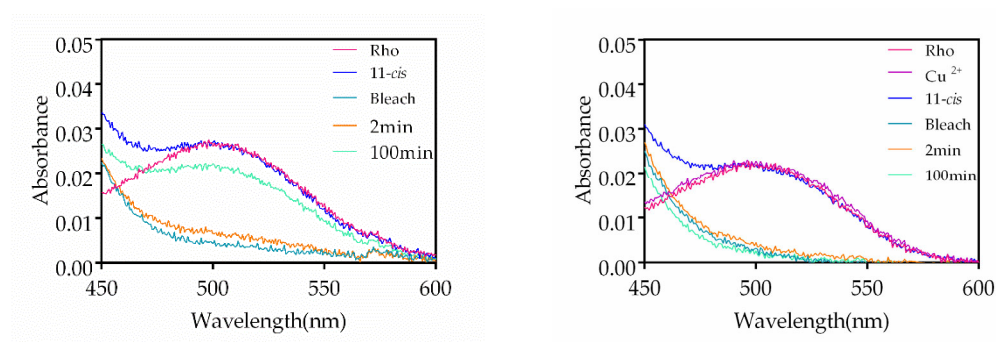

**Figure S2.** UV-vis absorption spectra of the chromophore regeneration process without (left panel) and with  $\text{Cu}^{2+}$  (right panel). The chromophore regeneration assay was carried out at 20°C in the dark. The details are described in the Methods section. **11-cis**, 11-cis-retinal added to the sample. **Bleach**, photobleached sample. **2min** and **100min**, spectra of the regenerated sample 2 min and 100 min after illumination, respectively. Note the absence of chromophore regeneration for the  $\text{Cu}^{2+}$ -containing sample (right panel)
